# Supplementary material for: Fluorescent tetracycline bone labeling as an intraoperative tool to debride necrotic bone during septic hip revision: a preliminary case series
Source: Copernicus journal article supplement (doi:10.5194/jbji-6-85-2021), 2021-01-27
Supplement: Supplementary file 1 [file availability code.xlsx]

## Sheet: Hoja1
n	initials	patient availability code	age	sex	nationality	past medical history	diagnosis	causative microorganism	treatment	outcome
1	EMR	5238177	67	female	venezuelan	Diabetes mellitus	chronic prosthetic hip infection	Staphylococcus aureus	2-stage septic revision	good
2	LMPB	541178	40	male	italian	Hepatitis C virus	chronic prosthetic hip infection	Staphylococcus aureus	2-stage septic revision	1st stage succesfully performed, awaiting for the 2n stage
3	LRF	80015443	68	female	spanish	Seronegative polyarthritis	native hip septic arthritis	Escherichia coli	2-stage hip replacement	good
