# Supplementary material for: Fluorescent tetracycline bone labeling as an intraoperative tool to debride necrotic bone during septic hip revision: a preliminary case series
Source: Copernicus journal article supplement (doi:10.5194/jbji-6-85-2021), 2021-01-27
Supplement: Supplementary file 1 [file jbji-6-85-2021-supplement.zip]

Archive with 2 entries (2 files):
- jbji-6-85-2021-supplement-title-page.pdf
- availability code.xlsx
