# Supplementary material for: Fluorescent tetracycline bone labeling as an intraoperative tool to debride necrotic bone during septic hip revision: a preliminary case series
Source: Copernicus journal article supplement (doi:10.5194/jbji-6-85-2021), 2021-01-27
Supplement: Supplementary file 1 [file jbji-6-85-2021-supplement.zip › jbji-6-85-2021-supplement-title-page.pdf]

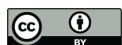

## *Supplement of*

# **Fluorescent tetracycline bone labeling as an intraoperative tool to debride necrotic bone during septic hip revision: a preliminary case series**

**Ernesto Muñoz-Mahamud et al.**

*Correspondence to:* Ernesto Muñoz-Mahamud (emunoz@clinic.cat, e.munoz.mahamud@gmail.com)

- [jbji-6-85-2021-supplement-title-page.pdf](#)
- [availability code.xlsx](#)

The copyright of individual parts of the supplement might differ from the article licence.
